## Addendum

**Addendum: Immunotherapy in Xeroderma Pigmentosum: a case of advanced cutaneous squamous cell carcinoma treated with cemiplimab and a literature review****Marco Rubatto<sup>1,\*</sup>, Martina Merli<sup>1,\*</sup>, Gianluca Avallone<sup>1</sup>, Andrea Agostini<sup>1</sup>, Luca Mastorino<sup>1</sup>, Virginia Caliendo<sup>1</sup>, Amelia Barcellini<sup>2</sup>, Viviana Vitolo<sup>2</sup>, Francesca Valvo<sup>2</sup>, Maria Teresa Fierro<sup>1</sup>, Simone Ribero<sup>1,#</sup> and Pietro Quaglino<sup>1,#</sup>**<sup>1</sup>Department of Medical Sciences, Section of Dermatology, University of Turin, Turin, Italy<sup>2</sup>National Center of Oncological Hadrontherapy (Fondazione CNAO), Pavia, Italy

\* Co-first authors

# Co-first senior authors

*Published: August 04, 2022***Copyright:** © 2022 Rubatto et al. This is an open access article distributed under the terms of the [Creative Commons Attribution License](#) (CC BY 3.0), which permits unrestricted use, distribution, and reproduction in any medium, provided the original author and source are credited.**Consent was added to this article:** The patient mentioned in the paper signed the informed consent statement on 13/10/2020.Original article: Oncotarget. 2021; 12:1116–1121. <https://doi.org/10.18632/oncotarget.27966>
